# Supplementary material for: Er:Y2O3 and Nd:Y2O3 Nanoparticles: Synthesis, Pegylation, Characterization and Study of Their Luminescence Properties
Source: MDPI journal article supplement (doi:10.3390/chemosensors11010020), 2022-12-26
Supplement: s1 [file s1]

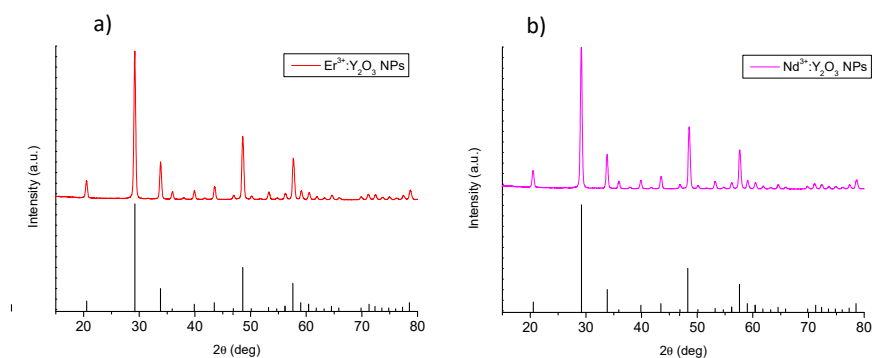

**Figure S1.** XRD patterns for a) Er:Y<sub>2</sub>O<sub>3</sub> and b) Nd:Y<sub>2</sub>O<sub>3</sub> NPs compared with the powder diffraction file ICDD 25-1011.

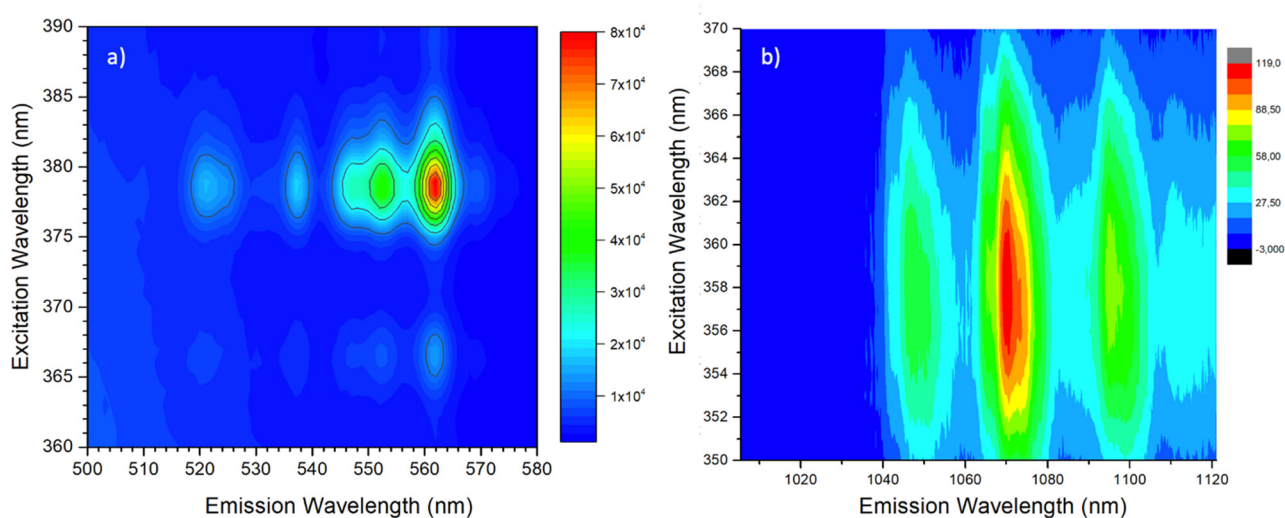

**Figure S2.** Photoexcitation 2D maps of a) Er:Y<sub>2</sub>O<sub>3</sub> NPs and b) Nd:Y<sub>2</sub>O<sub>3</sub> NPs.

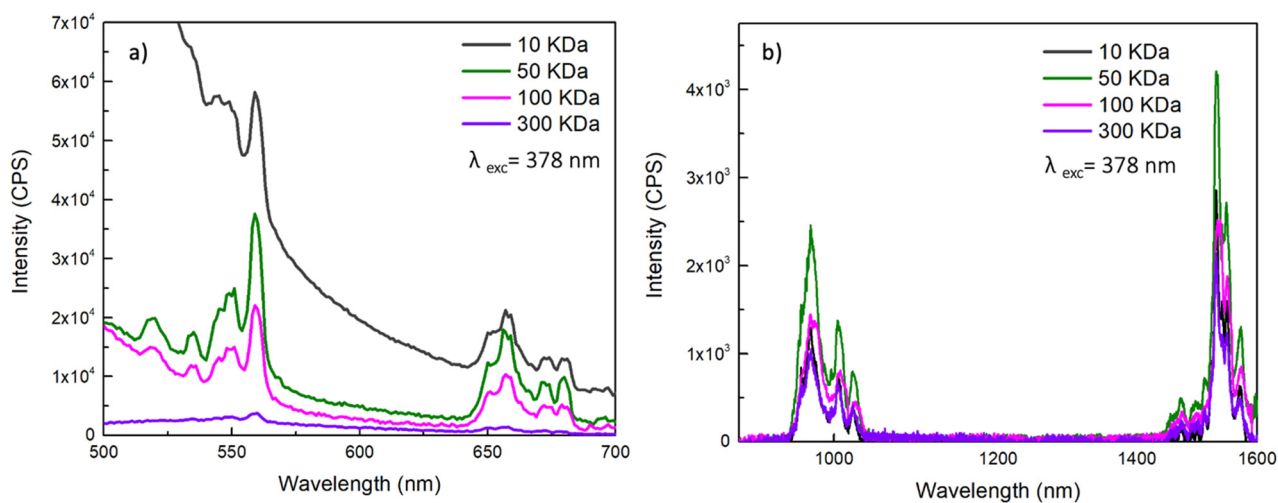

**Figure S3.** PL emission spectra comparison in a) visible and b) IR range of pegylated Er:Y<sub>2</sub>O<sub>3</sub> NPs, sample E3 after ultrafiltration using Amicon with a different pore size (λ<sub>exc</sub>=378 nm).

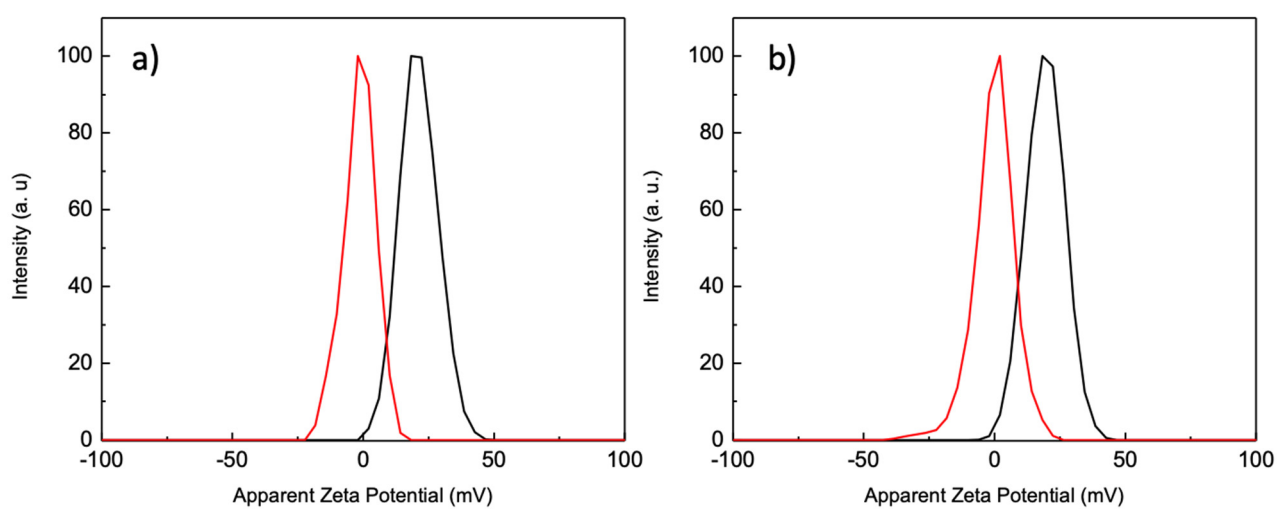

**Figure S4.** Zeta potential charts of core (in black) and pegylated (in red) for a) Er:Y<sub>2</sub>O<sub>3</sub> NPs and b) Nd:Y<sub>2</sub>O<sub>3</sub> NPs.
